# G-Banded Karyotype and Ideogram for the North Atlantic Right Whale (*Eubalaena glacialis*)

KIMBERLY C. PAUSE, ROBERT K. BONDE, PETER M. MCGUIRE, ROBERT T. ZORI, AND BRIAN A. GRAY

From the Department of Biochemistry and Molecular Biology, Box 100245 University of Florida Health Science Center, University of Florida, Gainesville, FL 32610 (Pause and McGuire); the Sirenia Project, Florida Integrated Science Center, U.S. Geological Survey, 2201 N.W. 40th Terrace, Gainesville, FL 32605 (Bonde); and the University of Florida Cytogenetics Laboratory, Division of Genetics, Department of Pediatrics, Box 100296 UFHSC, Gainesville, FL 32610 (Zori and Gray).

Address correspondence to B. A. Gray at the address above, or e-mail: grayba@peds.ufl.edu.

Published cytogenetic data for extant cetacean species remain incomplete. In a review of the literature, we found karyotypic information for 6 of the 13 tentatively recognized species of the suborder Mysticeti (baleen whales). Among those yet to be described is the critically endangered North Atlantic right whale (*Eubalaena glacialis*). Herein, we describe and propose

a first-generation G-banded karyotype and ideogram for this species ( $2n = 42$ ), obtained from peripheral blood chromosome preparations from a stranded male calf. This information may prove useful for future genetic mapping projects and for interspecific and intraspecific genomic comparisons by techniques such as zoo-FISH.

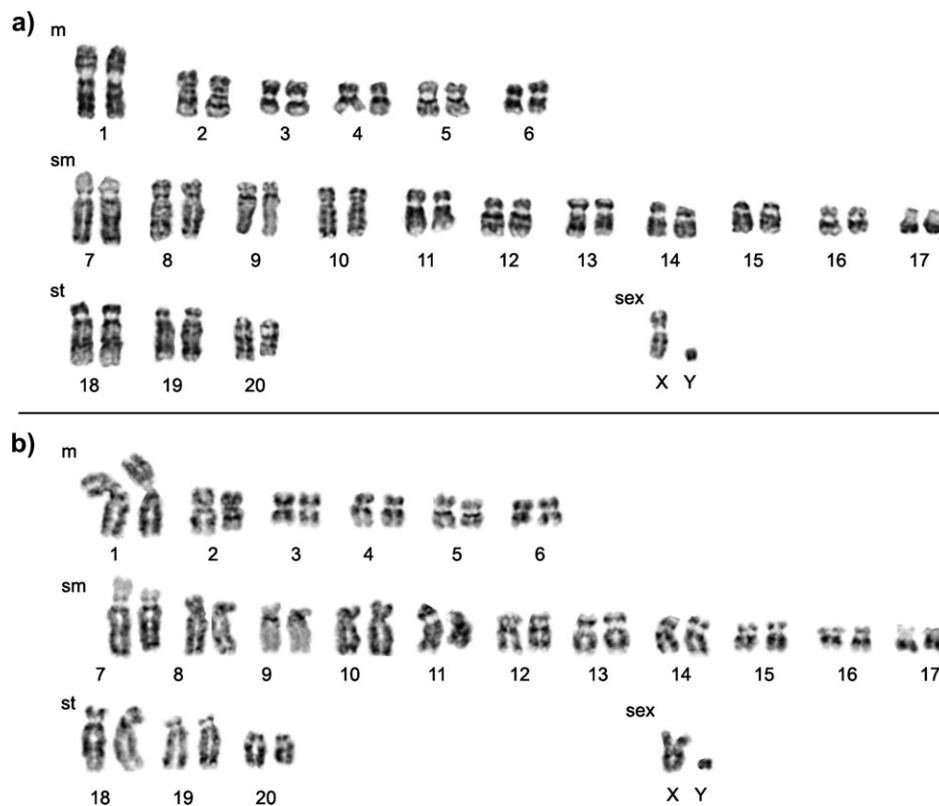

**Figure 1.** (a and b) Representative GTG-banded karyotypes for the North Atlantic right whale (*Eubalaena glacialis*). Metacentric (m), submetacentric (sm), subtelocentric (st), and the sex chromosomes (sex) are depicted in groups as described.

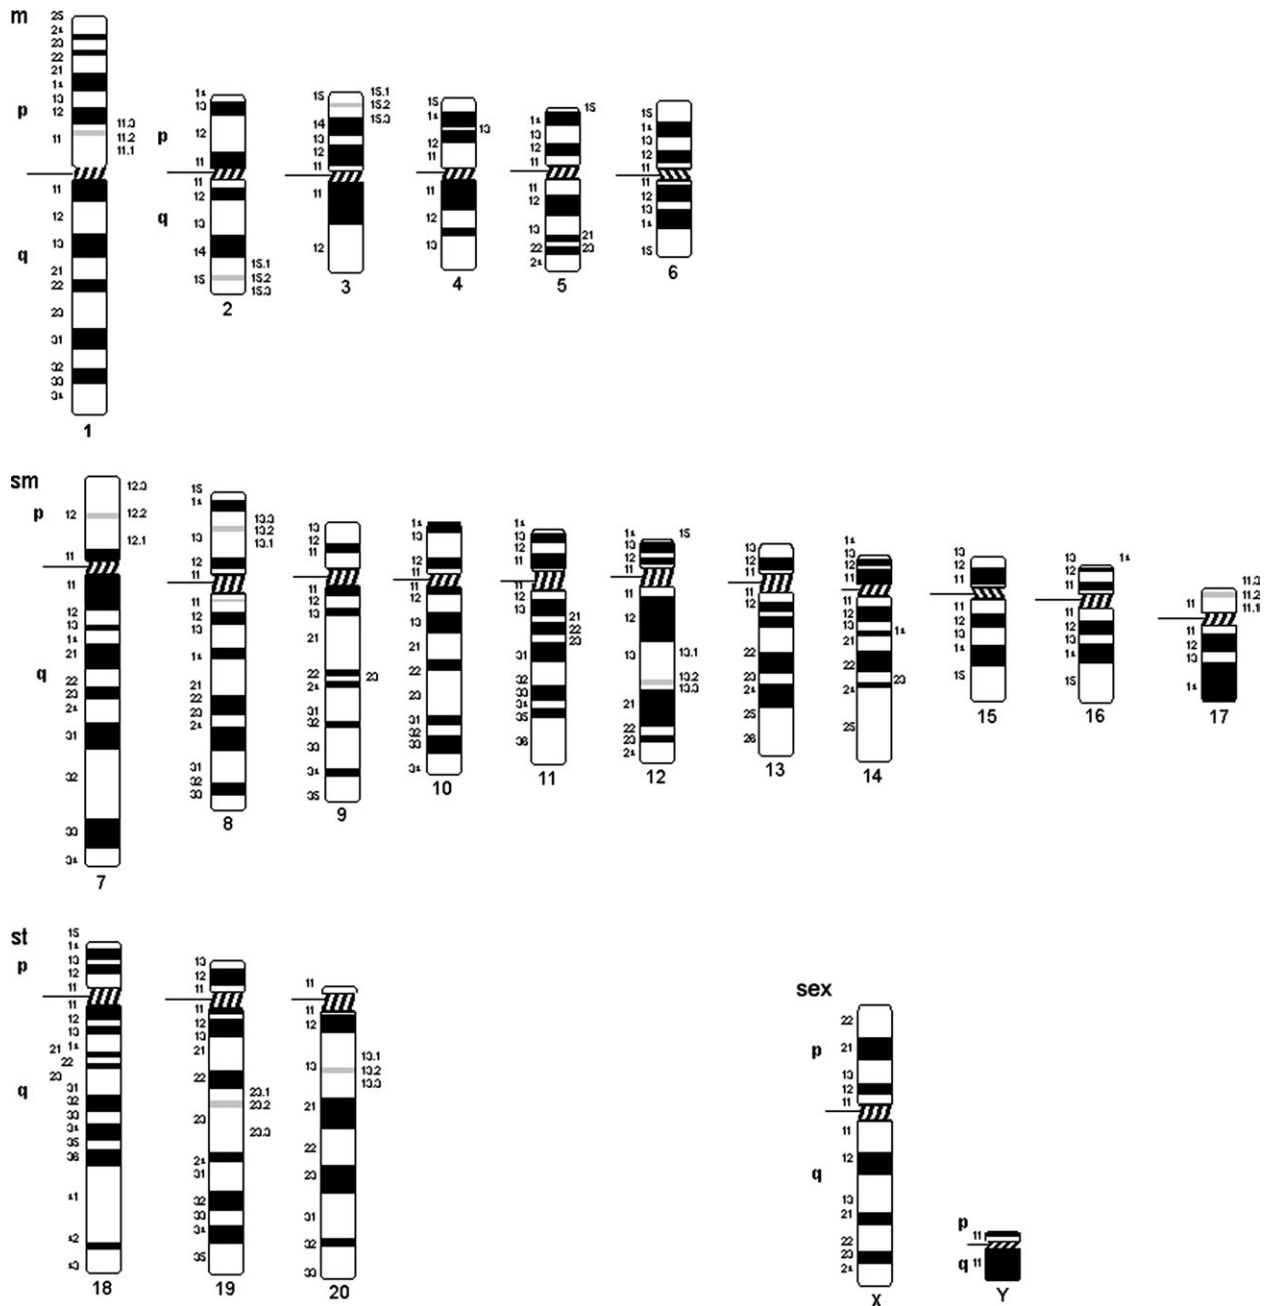

**Figure 2.** A 300-band G-band ideogram for the North Atlantic right whale (*Eubalaena glacialis*). Relative sizes and q/p arm ratios are presented in the ideogram as approximations.

The North Atlantic right whale (*Eubalaena glacialis*), one of 13 recognized species of the suborder Mysticeti (baleen whales), is considered one of the most endangered cetaceans, with a population estimate of approximately 300 individuals (Knowlton et al. 1994; Kraus et al. 2001). Although there have been multiple genetic studies for *E. glacialis* assessing the population status and genetic diversity via the use of microsatellites and mitochondrial DNA (Arnason et al. 1993; Malik et al. 2000; Rosenbaum et al. 2000; Waldick et al. 2002), to our knowledge there have been no published

reports describing a conventional or banded karyotype for this species.

The winter months of December through March are considered the calving season for *E. glacialis*, correlating with a migration to the calving grounds off the Atlantic coastal areas of the continental United States in the north Florida and south Georgia regions (Knowlton et al. 1994). In February 2004, a live-stranded North Atlantic right whale calf (RKB-1457) was discovered on American Beach, Amelia Island, Florida, United States. (30°35'30"N, 81°26'30"W). Prior to its

**Table 1.** Relative lengths and arm ratios of North Atlantic right whale (*Eubalaena glacialis*) chromosomes based on measurements from five metaphase cells. Chromosome pairs were assigned to a given morphological group following the method as described by Levan et al. (1964)

| Groups          | Assigned chromosomes | Relative mean length | Mean $q/p$ arm ratio |
|-----------------|----------------------|----------------------|----------------------|
| Metacentric     | 1                    | 4.14                 | 1.26                 |
|                 | 2                    | 2.47                 | 1.47                 |
|                 | 3                    | 1.96                 | 1.20                 |
|                 | 4                    | 1.91                 | 1.45                 |
|                 | 5                    | 1.86                 | 1.25                 |
|                 | 6                    | 1.65                 | 1.37                 |
| Submetacentric  | 7                    | 3.69                 | 2.30                 |
|                 | 8                    | 3.17                 | 1.88                 |
|                 | 9                    | 2.90                 | 2.83                 |
|                 | 10                   | 2.83                 | 2.13                 |
|                 | 11                   | 2.47                 | 1.92                 |
|                 | 12                   | 2.23                 | 1.89                 |
|                 | 13                   | 2.16                 | 1.79                 |
|                 | 14                   | 1.95                 | 1.81                 |
|                 | 15                   | 1.82                 | 2.18                 |
|                 | 16                   | 1.61                 | 1.72                 |
| Subtelocentric  | 17                   | 1.43                 | 2.01                 |
|                 | 18                   | 3.52                 | 3.08                 |
|                 | 19                   | 2.83                 | 3.16                 |
| Sex chromosomes | 20                   | 2.16                 | 5.95                 |
|                 | X                    | 2.55                 | 1.57                 |
|                 | Y                    | na                   | na                   |

demise, a blood sample was obtained from the tail fluke, which provided a rare opportunity to generate cytogenetic preparations for this species.

## Methods

Blood cultures for cytogenetic preparations were prepared following culturing techniques, as previously described for the Florida manatee (Gray et al. 2002). GTG-banding was performed as a primary chromosome-banding procedure to facilitate specific identification of all homologs (Seabright 1971).

**Table 2.** Published karyotypic data for the suborder Mysticeti (baleen) whales

| Family          | Species                                                 | 2n | Banding methods | Reference                             |
|-----------------|---------------------------------------------------------|----|-----------------|---------------------------------------|
| Eschrichtiidae  | <i>Eschrichtius robustus</i> <sup>a</sup> (gray whale)  | 44 | G, C, NOR       | Arnason (1974, 1981)                  |
| Balaenopteridae | <i>Balaenoptera acutorostrata</i> (minke whale)         | 44 | G, C            | Arnason (1974), Arnason et al. (1977) |
|                 | <i>Balaenoptera bonaerensis</i> (Antarctic minke whale) | —  | —               | —                                     |
|                 | <i>Balaenoptera borealis</i> (sei whale)                | 44 | G, Q, C         | Arnason (1974)                        |
|                 | <i>Balaenoptera edeni</i> (Bryde's whale)               | —  | —               | —                                     |
|                 | <i>Balaenoptera musculus</i> (blue whale)               | 44 | Solid, C        | Arnason et al. (1985)                 |
|                 | <i>Balaenoptera physalus</i> (fin whale)                | 44 | G, Q, C         | Arnason (1969)                        |
|                 | <i>Megaptera novaeangliae</i> (humpback whale)          | —  | —               | —                                     |
| Balaenidae      | <i>Balaena mysticetus</i> (bowhead whale)               | 42 | Solid, G        | Jarrell (1979)                        |
|                 | <i>Eubalaena australis</i> (Southern right whale)       | —  | —               | —                                     |
|                 | <i>Eubalaena glacialis</i> (North Atlantic right whale) | 42 | G               | Present study                         |
|                 | <i>Eubalaena japonica</i> (North Pacific right whale)   | —  | —               | —                                     |
| Neobalaenidae   | <i>Caperea marginata</i> (pygmy right whale)            | —  | —               | —                                     |

<sup>a</sup> Formerly *Eschrichtius gibbosus*.

Five complete sets of chromosomes were measured for relative total length, and arm ratios ( $q/p$ ) were calculated. Karyotypes were constructed by pairing and grouping chromosomes according to morphologies, relative lengths, and banding patterns. Metaphase imaging and karyotype production were facilitated by computer-assisted methods utilizing CytoVision Genus software (Applied Imaging, Inc., San Jose, CA). To facilitate comparison with other species, the karyotype groups were presented in a fashion similar to the published karyotype for the bowhead whale, *Balaena mysticetus* (Jarrell 1979), as well as for other published cetacean species (Figure 1a,b). A proposed first-generation ideogram for the karyotype of this species was constructed based on the G-banded metaphase images using conventional computer graphics software (Figure 2).

## Results

Nineteen metaphase cells of suitable quality for karyotyping and/or counting were obtained from the cell culture established, and the modal chromosome number was determined to be 42. The karyotype was divided into three distinctive autosomal groups (Table 1), with the sex chromosomes depicted separately. Six pairs were assigned to the metacentric group, 11 pairs were assigned to the submetacentric group, and 3 pairs were assigned to the subtelocentric group.

## Discussion

In a review of the literature, we found karyotypic data for 6 of the 13 species of the suborder Mysticeti (Table 2). Among the four tentatively recognized members of the family Balaenidae [*Balaena mysticetus* (bowhead whale), *E. glacialis* (North Atlantic right whale), *Eubalaena japonica* (North Pacific right whale), and *Eubalaena australis* (Southern right whale)], we found karyotype data for only *B. mysticetus* (Jarrell 1979), which also contained a chromosome count of 42. Further comparison with that of the published karyotype of *B. mysticetus* revealed multiple pairs of chromosomes with analogous morphologies

and banding patterns, including several with different morphological group assignments. For example, the chromosome pair 17 reported here as submetacentric appears very similar in both relative size and banding pattern to the chromosome pair 7 reported as metacentric for *B. mysticetus*. We believe that some of the morphological differences reported between these two species may simply reflect differences in the measurement techniques employed by the investigators, especially in the metacentric and submetacentric groups. However, clear structural differences between these two species also appear evident by comparison. Although, we choose not to assign any of *E. glacialis* chromosomes to a telocentric group, as all chromosomes included a measurable short arm, the chromosome 20 pair was the only pair whose morphology approached a telocentric appearance in this study, whereas, three such pairs are described in *B. mysticetus*.

Although the cytogenetic data presented here are limited in quantity and quality, representing only a single animal, we believe that, in light of the rarity of opportunities to study the North Atlantic right whale, the karyotypic data obtained warrant presentation. The karyotype data and technical parameters for this single individual could provide a foundation for future studies, including the refinement of the karyotype of this species, as well as detailed interspecific and intraspecific karyotypic comparisons currently not possible.

## Acknowledgments

This research was conducted under the National Oceanic and Atmospheric Administration Fisheries authority granted to the U.S. Geological Survey, Sirenia Project. Many thanks are given to the staff at the R. C. Philips Unit/University of Florida Cytogenetics Laboratory for all of their expertise and the laboratory space necessary for the completion of this project.

## References

- Arnason U, 1969. Karyotype of the fin whale. *Hereditas* 62:273–284.
- Arnason U, 1974. Comparative chromosome studies in cetacea. *Hereditas* 77:1–36.

- Arnason U, 1981. Banding studies on the gray and sperm whale karyotypes. *Hereditas* 95:277–281.
- Arnason U, Bellamy H, Eyporsson P, Lutley R, Sigurjonsson J, and Widegren B, 1985. Conventionally stained and C-banded karyotypes of a female blue whale. *Hereditas* 102:251–253.
- Arnason U, Benirschke K, Mead JG, and Nichols WW, 1977. Banded karyotypes of 3 whales—*Mesoplodon europaeus*, *Mesoplodon carlhubbsi* and *Balaenoptera acutorostrata*. *Hereditas* 87:189–200.
- Arnason U, Gullberg A, and Widegren B, 1993. Cetacean mitochondrial-DNA control region—sequences of all extant baleen whales and 2 sperm whale species. *Mol Biol Evol* 10:960–970.
- Gray BA, Zori RT, McGuire PM, and Bonde RK, 2002. A first generation cytogenetic ideogram for the Florida manatee (*Trichechus manatus latirostris*) based on multiple chromosome banding techniques. *Hereditas* 137:215–223.
- Jarrell GH, 1979. Karyotype of the bowhead whale (*Balaena mysticetus*). *J Mammal* 60:607–610.
- Knowlton AR, Kraus SD, and Kenney RD, 1994. Reproduction in North Atlantic right whales (*Eubalaena glacialis*). *Can J Zool* 72:1297–1305.
- Kraus S, Hamilton P, Kenney R, Knowlton A, and Slay C, 2001. Reproductive parameters of the North Atlantic right whale. *J Cetacean Res Manag (Special Issue)* 2:231–236.
- Levan A, Fredga K, and Sandberg A, 1964. Nomenclature for centromeric position on chromosomes. *Hereditas* 52:201–220.
- Malik S, Brown MW, Kraus SD, and White BN, 2000. Analysis of mitochondrial DNA diversity within and between North and South Atlantic right whales. *Mar Mammal Sci* 16:545–558.
- Rosenbaum HC, Brownell RL, Brown MW, Schaeff C, Portway V, White BN, Malik S, Pastene LA, Patenaude NJ, Baker CS, Goto M, Best PB, Clapham PJ, Hamilton P, Moore M, Payne R, Rowntree V, Tynan CT, Bannister JL, and DeSalle R, 2000. World-wide genetic differentiation of *Eubalaena*: questioning the number of right whale species. *Mol Ecol* 9:1793–1802.
- Seabright M, 1971. A rapid banding technique for human chromosomes. *Lancet* 2:971–972.
- Waldick RC, Kraus SS, Brown M, and White BN, 2002. Evaluating the effects of historic bottleneck events: an assessment of microsatellite variability in the endangered, North Atlantic right whale. *Mol Ecol* 11:2241–2250.

Received September 5, 2005

Accepted February 27, 2006

Corresponding Editor: Hector Seuanez
